# Supplementary material
Source: publisher site journal article supplement (https://www.dovepress.com/article/301212)
Supplement: Supplementary file 1 [file get_supplementary_file.php]

**Supplementary material**

**Promotion of surgical masks antimicrobial activity by disinfection and impregnation with disinfectant silver nanoparticles**

**
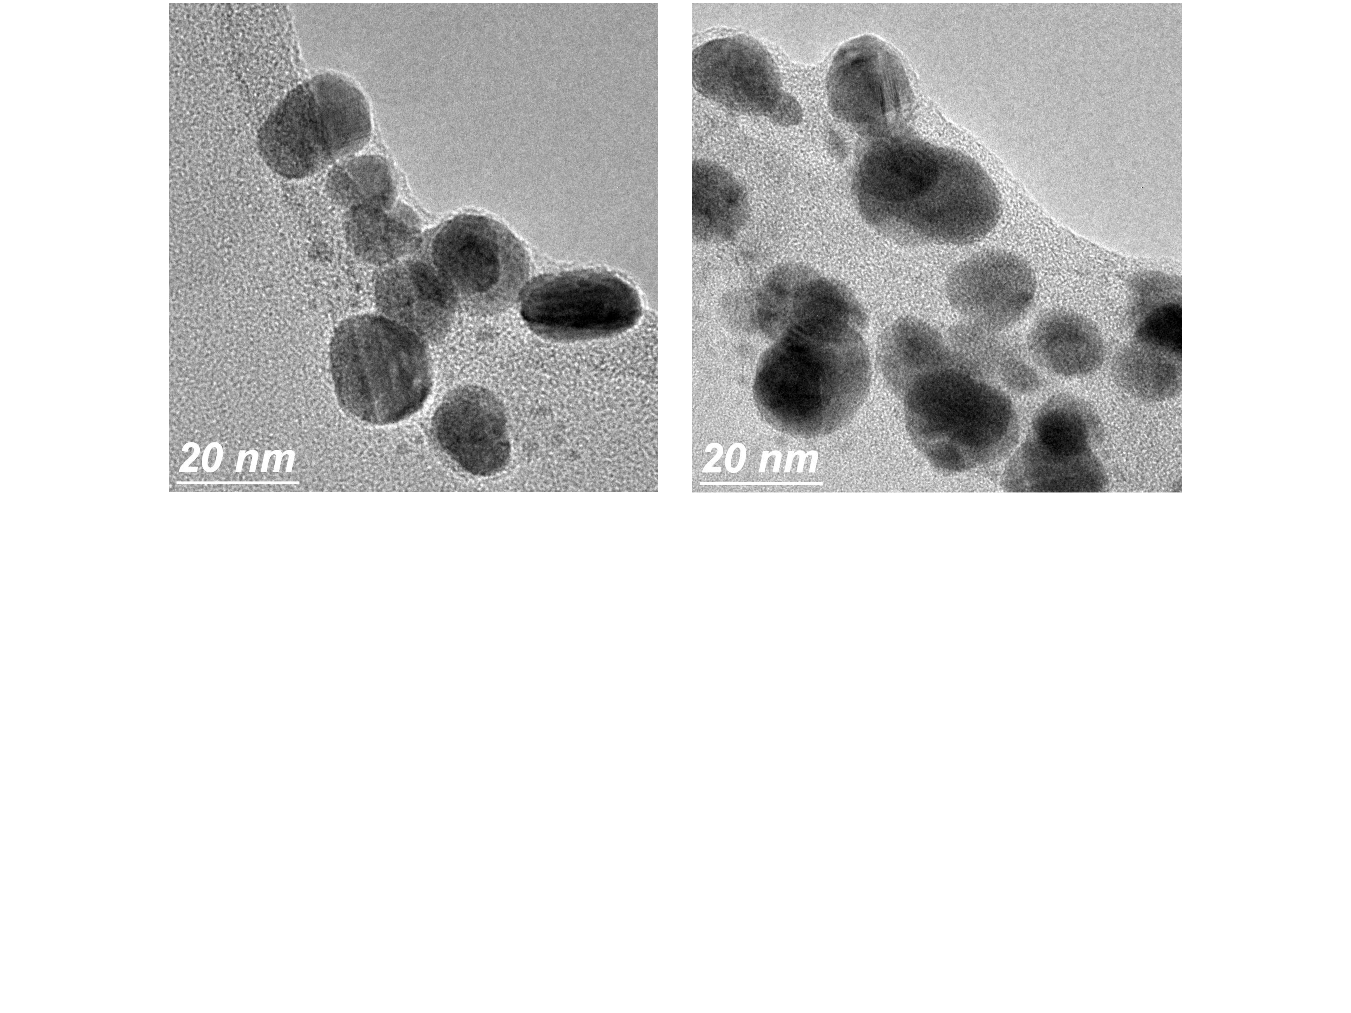
**

**Figure. S1. Low magnified HR-TEM micrographs of AgNPs.**

**
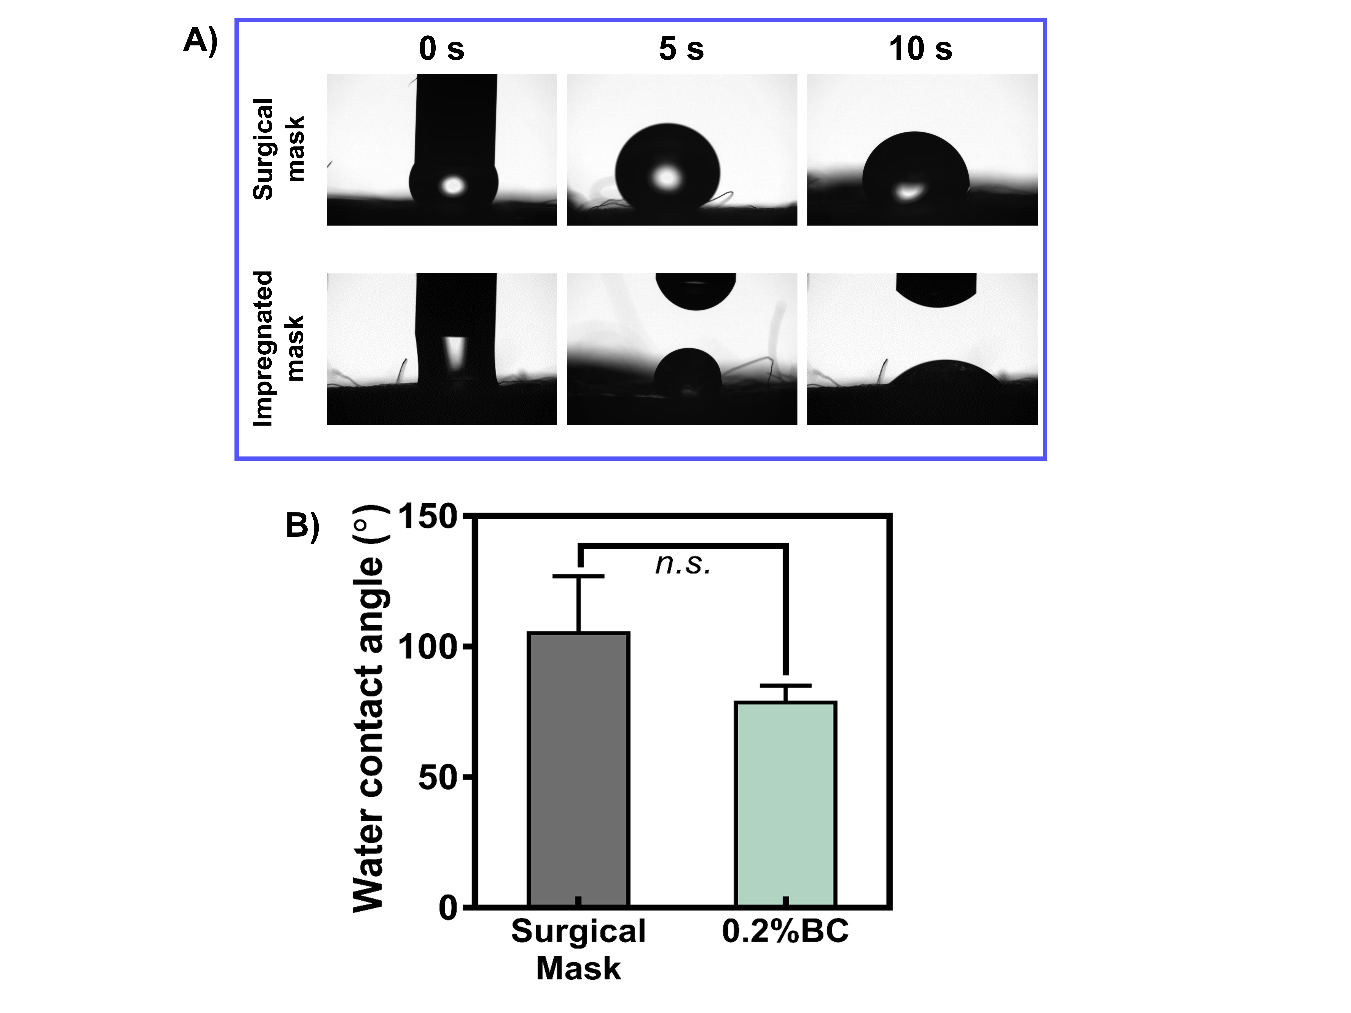
**

**Figure S2. WCA behavior of the experimental surgical masks. A) High resolution images illustrating the droplet behavior on the materials. B) WCA after 10 s of droplet deposition. n.s., no significant differences.**
